# Supplementary material for: Expression patterns of transcribed human endogenous retrovirus HERV-K(HML-2) loci in human tissues and the need for a HERV Transcriptome Project
Source: PubMed Central journal article supplement (PMC2525661; doi:10.1186/1471-2164-9-354), 2008-07-29
Supplement: 1471-2164-9-354-S2.pdf [file 1471-2164-9-354-S2.pdf]

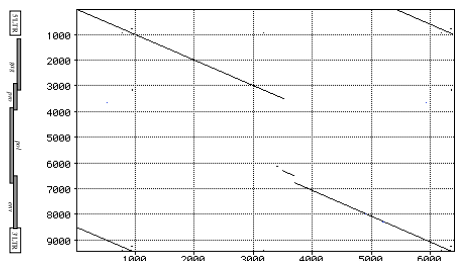

c1\_A

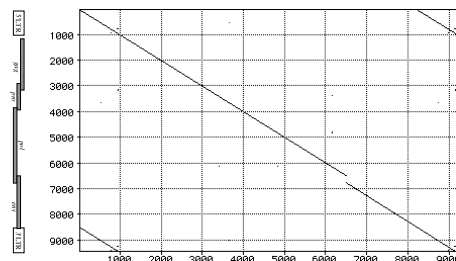

c1\_B

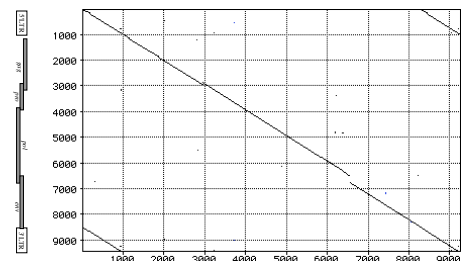

c1\_C

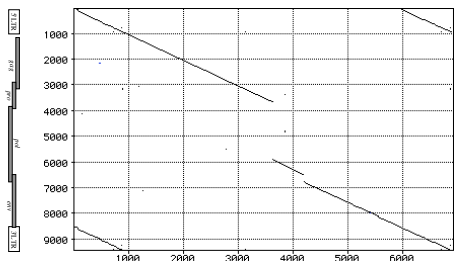

c3\_A

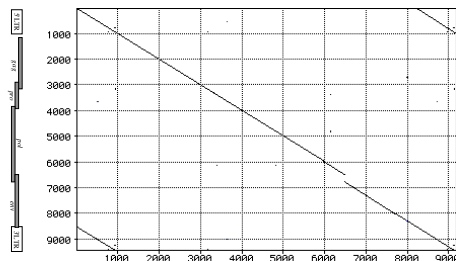

c3\_B

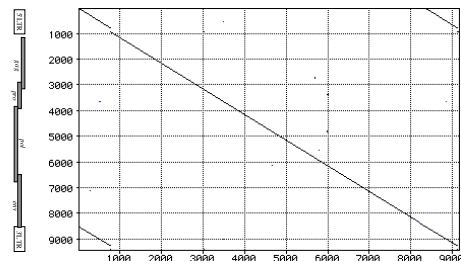

c3\_C

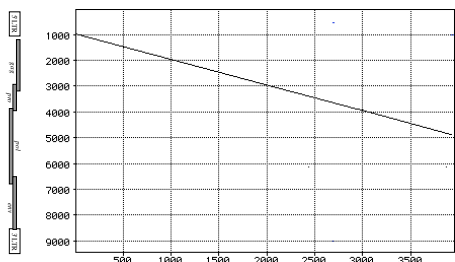

c3\_D

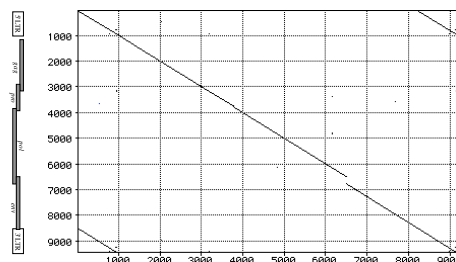

c3\_E

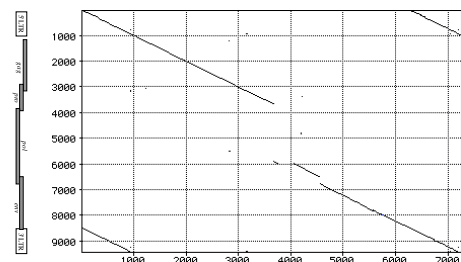

c4\_A

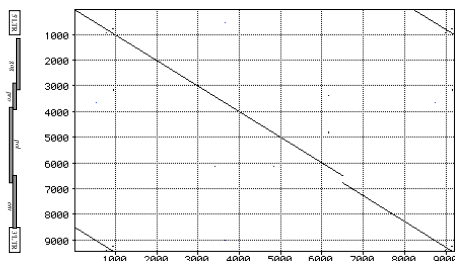

c5\_A

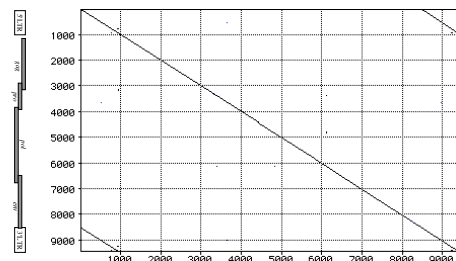

c6\_A

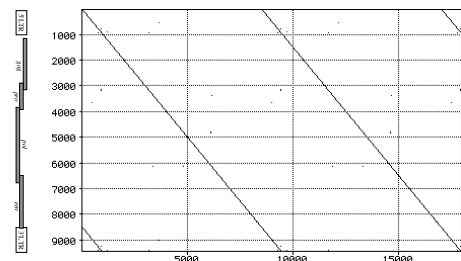

c7\_A

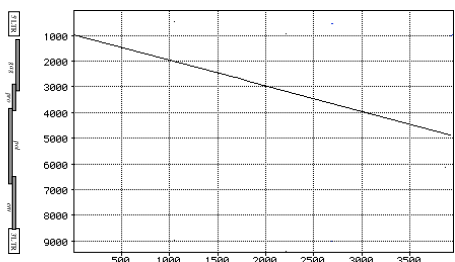

c7\_B

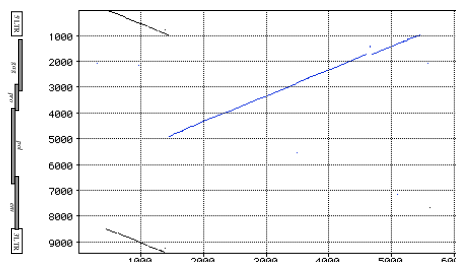

c7\_C

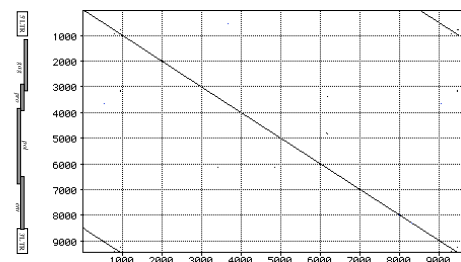

c8\_A

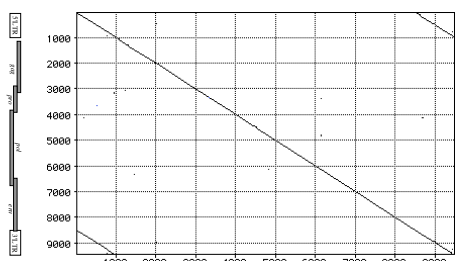

c10\_A

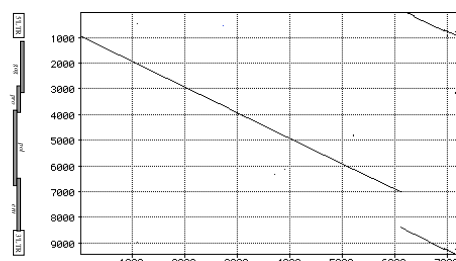

c10\_B

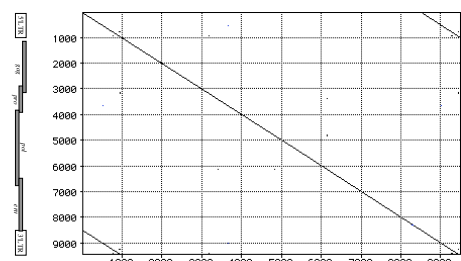

c11\_A

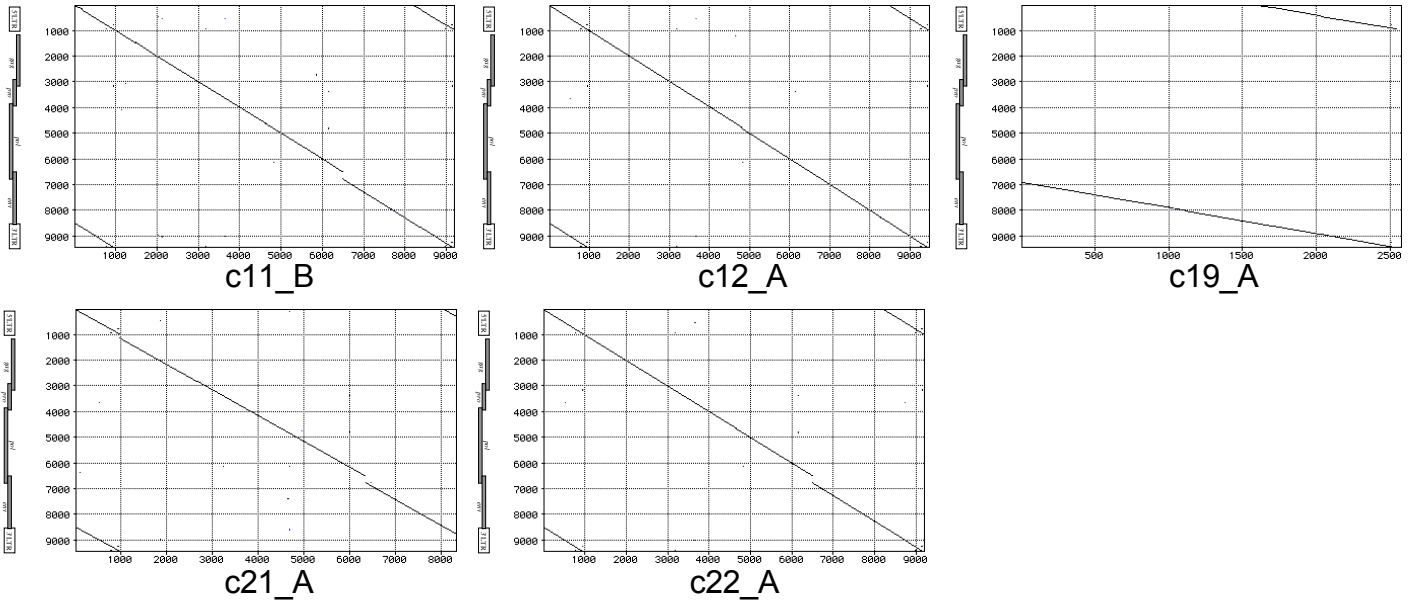

Flockerzi et al. [Additional Figure 1](#): Pustell matrix comparisons of HERV-K(HML-2) proviruses identified as transcriptionally active in this study. Proviral sequences were compared to the previously published HERV-K(HML-2.HOM) sequence. Location of LTR and proviral *gag*, *pro*, *pol* and *env* genes within the latter sequence is indicated. The following parameters were applied for comparisons: Window size = 30 nt; Min. % Score = 55; Hash Value = 6; Jump = 1; Strands = both. Note that provirus *c7\_A*—the actual HERV-K(HML-2.HOM) provirus—is represented in tandem structure in the human genome reference sequence. HERV-K(HML-2) type 1 loci display a gap at nt 6500 with respect to the HERV-K(HML-2.HOM) sequence, as opposed to type 2 loci. Provirus sequences were reverse complemented prior to comparison if located in antisense on the respective human chromosome. The following parameters were applied for comparisons: Window size = 30 nt; Min. % Score = 55; Hash Value = 6; Jump = 1; Strands = both. Thus, each position in one sequence that shares on the DNA level at least 55% similarity in a 30 nt window to the other sequence is marked by a dot, and producing a line for longer stretches of DNA.
