# Supplementary material for: Expression patterns of transcribed human endogenous retrovirus HERV-K(HML-2) loci in human tissues and the need for a HERV Transcriptome Project
Source: PubMed Central journal article supplement (PMC2525661; doi:10.1186/1471-2164-9-354), 2008-07-29
Supplement: 1471-2164-9-354-S3.pdf [file 1471-2164-9-354-S3.pdf]

**A**

|          | <i>gag</i><br>plus      | <i>gag</i><br>cdNA | <i>gag</i><br>minus (rev. compl.) |
|----------|-------------------------|--------------------|-----------------------------------|
|          | GGCCATC-AGAGTCTAAACCACG |                    | GGTCCGAAGAAATAGGGCTGC             |
| c1_A     | .....-.....             | yes                | .....                             |
| c1_B     | .....-.....T.           | yes                | .....                             |
| c1_C     | .....T-.....            | yes                | .....                             |
| c3_A     | .....-.....             | yes                | .....A.....                       |
| c3_B     | .....-.....             | yes                | .....                             |
| c3_C     | .....-.....T.           | yes                | .....                             |
| c3_D     | .....-.....             | yes                | .....T.....                       |
| c3_E     | .....-.....             | yes                | .....                             |
| c4_A     | .....-.....C.....       | yes                | .....                             |
| c5_A     | .....-.....             | yes                | .....                             |
| c6_A     | .....-.....             | yes                | .....                             |
| c7_A     | .....-.....             | yes                | .....                             |
| c7_B     | .....-.....             | yes                | .....                             |
| c7_C     | .....-.....             | yes                | .....T.....C.....                 |
| c8_A     | .....-.....             | yes                | .....                             |
| c10_A    | .....-A.....            | yes                | .....T.....                       |
| c10_B    | .....-.....G.....       | yes                | .....                             |
| c11_A    | .....-.....T.           | yes                | .....                             |
| c11_B    | .....-.....             | yes                | .....                             |
| c12_A    | .....-.....             |                    | .....A.....                       |
| c19_A    | -----                   |                    | -----                             |
| c21_A    | .....C-.....            | yes                | .....A.....                       |
| c22_A    | .....-.....             | yes                | .....                             |
| 1p36.21  | ...T.C-...C.....C       |                    | ..CAT...A...CA...AT               |
| 1p36.21  | ...T.C-...C.....A       |                    | ..CA...A...CA...AT                |
| 3p12.3   | .....-.....T.G...T.     |                    | ..AT.G.A...CA...AT                |
| 3q12.3   | .....-.....             |                    | ..A...A...CA...A.                 |
| 4p16.2   | .....-.....T.G.....     |                    | ..AT...A...CA...A.                |
| 4p16.3   | -----                   |                    | ..A...A...CA...A.                 |
| 4p16.1   | .....-.....T.G...A.     |                    | ..AT...A...CA...A.                |
| 4q32.2   | .....-.....             |                    | .....                             |
| 5p11     | .....A-...CA.....T.     |                    | .....                             |
| 5p13.3   | .....T-.....T.          |                    | .....                             |
| 5q33.2   | ..T-.....T.....         |                    | ..AA.G.A...CA...A.                |
| 6p21.1   | .....-.....C.....       |                    | ..A...A...CA...T.A.               |
| 6p11.2   | .....T-G.G.CTA.....A    |                    | -----                             |
| 6p22.1   | ...G-.....A             |                    | ..A...A...A.....                  |
| 8p22     | -----                   |                    | A.AT.A...A...CC.T....             |
| 8p23.1   | .A.....-.....T.G.A....  |                    | ..A...A...CA...A.                 |
| 8p23.1   | .A.....-.....T.G.....   |                    | ..A...A...CA...A.                 |
| 8p23.1   | .....-.....T.G.....     |                    | ..A...A...CA...A.                 |
| 8q11.1   | ...T.T-G.G.CTA.....     |                    | -----                             |
| 8q24.3   | .....-.....             |                    | .....                             |
| 8q24.3   | .....-.....T.G.....     |                    | ..A.G.A...CA...A.                 |
| 9q34.11  | .....T-G.G.CTAC.....A   |                    | -----                             |
| 9q34.3   | .....-.....             |                    | .....A.....                       |
| 11p15.4  | .....-.....T.G.....     |                    | .C.A...A...CA...A.                |
| 11q12.1  | .....TTG.G.CTA.....G.   |                    | -----                             |
| 11q12.3  | .....-.....T.....       |                    | ...T...T.....                     |
| 12q24.33 | ...TG.T-G.G.TA...G...   |                    | -----                             |
| 14q11.2  | .T.....-.....T.G.....   |                    | ..AT.G.A...CA...A.                |
| 16p13.3  | .....-.....A            |                    | -----                             |
| 17p13.1  | -----                   |                    | A.AT...A...CC.T....               |
| 19p12    | .....-.....             |                    | .....                             |
| 19p12    | .....-.....T.           |                    | ...A.A.....                       |
| 19p12    | .....-.....             |                    | T...T.....                        |
| 19q12    | .....-.....             |                    | .....                             |
| 19q13.12 | .....-.....             |                    | ...A.A.....                       |
| 19q13.41 | ...T...A-G.G.CTA.....   |                    | -----                             |
| 20q11.22 | .....-.....C.....       |                    | .A...C.A...C...                   |
| 22q11.23 | .....-.....C.....       |                    | ..A...A...CA...A.                 |
| Xq28     | ...G-...G.CTA.....      |                    | .....                             |
| Yp11.2   | .....-.....T.G...G.T.   |                    | T...A.AG.A...CA...A.              |

## B

|          | env8146f                | env<br>cDNA | env8665r (rev. compl.)      |
|----------|-------------------------|-------------|-----------------------------|
|          | AATGAGTCTGAGCATCACTGGG  |             | CTGTGTC-CACTCAGAGTTGAATGG   |
| c1_A     | .....                   | yes         | .....-A.....A.....          |
| c1_B     | .....                   | yes         | .....-A.....G.....          |
| c1_C     | .....                   |             | .....AA.....G.....A.....    |
| c3_A     | .....                   | yes         | .....-.....G.....A.....     |
| c3_B     | .....                   | yes         | .....-A.....A.....          |
| c3_C     | .....A.....             | yes         | .....-A.....                |
| c3_D     | -----                   |             | -----                       |
| c3_E     | .....                   |             | ..C.....-A.....A.....       |
| c4_A     | .....                   |             | .....-A.....G.....A.....    |
| c5_A     | .....                   | yes         | .....-A.....G.....          |
| c6_A     | .....                   | yes         | .....-A.....A.....          |
| c7_A     | .....                   | yes         | .....-.....                 |
| c7_B     | GT..G.CGCC..ATGT.GG..-  |             | -----                       |
| c7_C     | GG.TG.G.GCCAG..G.AG..-  |             | -----                       |
| c8_A     | .....C.....             |             | .....-A.....G.....          |
| c10_A    | .....                   | yes         | .....-A.....G.....A.....    |
| c10_B    | -----                   |             | -----                       |
| c11_A    | .....                   | yes         | .....-A.....                |
| c11_B    | .....                   |             | .....AA.....G.....A.....    |
| c12_A    | .....                   | yes         | .....-A.....A.....          |
| c19_A    | .....A.....A.....       | yes         | .....-.....G.....           |
| c21_A    | .....A.....A.....       | yes         | .....-A.....                |
| c22_A    | .....                   | yes         | .....-A.....A.....          |
| 1p36.21  | .....A.....             |             | T...A.G-G.A...GAG...T.G..   |
| 1p34.3   | .....                   |             | .....-G.....AG...T.....     |
| 1q21.2   | -----                   |             | -----                       |
| 1q24.1   | .....                   |             | T...-A.G-G.A...AG...T.G..   |
| 1q32.2   | .....                   |             | .....-A.....G.....A.....    |
| 1q43     | .....                   |             | .....A.G-G.A...AG...T.G..   |
| 2q21.1   | .....                   |             | .....AA.....G.....A.....    |
| 2q32.1   | .....                   |             | .....-.....AGA...T.....     |
| 3p12.3   | -----                   |             | T...A.G-A.A...AG...T.G..    |
| 3p12.3   | TGATG..TCC...ATGGAAAA   |             | -----                       |
| 3p12.3   | ..C..A.....A.....       |             | T...A.A-A.A...AG...T.G..    |
| 3q12.3   | .....                   |             | .....AA.....G.....A.....    |
| 3q21.2   | -----                   |             | T...A.G-A.A...AG...T.G..    |
| 4p16.2   | .....A.....A.....       |             | -----                       |
| 4p16.2   | -----                   |             | T...A.G-A.A...AG...T.GAC    |
| 4p16.1   | -----                   |             | T...A.G-A.A...AG...T.G..    |
| 4p16.1   | -----                   |             | T...A.G-A.A...AG...T.G..    |
| 4p16.1   | .....A.....A.....       |             | T...A.A-A.A...AG...T.G..    |
| 5p11     | .....A...T...G..T..     |             | .....-A.....G...AC....      |
| 5p13.3   | .....                   |             | .....-A.....A.....          |
| 5q33.2   | .....A.A.....A.....     |             | T...CA.G-A.A...AG...T.G..   |
| 6p22.1   | .....                   |             | .....T-G...AG...T.G..       |
| 6p21.1   | .....                   |             | T...A.G-G.A...AG...T.G..    |
| 6p11.2   | -----                   |             | T...A.A-A.A...AG...T.G..    |
| 6q25.1   | .....C.....C.....       |             | .....A...-A.A...AG...T..... |
| 7q11.21  | .....C.....A.....A..... |             | T...A.G-G.A...AG...T.G..    |
| 8p22     | .....TTA...A...G....    |             | -----                       |
| 8p23.1   | -----                   |             | T...A.G-A.A...AG...T.G.C    |
| 8p23.1   | -----                   |             | T...A.G-A.A...AG...T.G.C    |
| 8p23.1   | .....A.....A.G.....     |             | T...A.A-A.A...AG...TG.G..   |
| 8p23.1   | -----                   |             | T...A.G-A.A...AG...T.G.C    |
| 8p23.1   | .....A.....A.G.....     |             | T...A.A-A.A...AG...TG.G..   |
| 8p23.1   | .....A.....A.G.....     |             | T...A.A-A.A...AG...TG.G..   |
| 8q11.1   | .....A.....A.....       |             | T...A.G-G.A...AG.C.T.G..    |
| 8q24.3   | .....                   |             | .....-A.....A.....          |
| 8q24.3   | .....A.....A.....       |             | T...A.G-A.G...AG...T.G..    |
| 9q34.11  | .....A.....A.....       |             | T...C.G-G.A...AG...T.G..    |
| 9q34.3   | -----                   |             | .....T-A...AG...TG.G..      |
| 11p15.4  | .....AC...A.....        |             | T...C.A-A.A...AG...T.G..    |
| 11q12.1  | .....A.....             |             | T...A.G-G.A...AG...T.G..    |
| 11q12.3  | -----                   |             | TC...A.G-A.A...AG...T.G..   |
| 11q13.2  | -----                   |             | TC...A.G-A.A...AG...T.G..   |
| 11q13.4  | -----                   |             | T...A.G-A.A...AG...T.G..    |
| 12q24.33 | .....A.....A.....       |             | T...A.A-A.A...AT...T.G..    |
| 14q11.2  | -----                   |             | T...A.G-A.A...AG...T.G..    |
| 16p11.2  | .....                   |             | .....-A.....A.....          |
| 16p13.3  | TCCCC.G...GCTCAGT.A.T-  |             | -----                       |
| 19p12    | .....                   |             | .....-A.....                |
| 19p12    | .....                   |             | .....T-G.T...AG...T.....    |
| 19p12    | .....                   |             | .....-A.....G.....A.....    |
| 19p12    | .....                   |             | .....T-G...AG...T.....      |
| 19q12    | .....                   |             | .....-A.....A.....          |
| 19q13.12 | .....                   |             | -----                       |
| 19q13.41 | .....T.....             |             | .....A.T-G.A...AG...T.....  |
| 20q11.22 | .....                   |             | .....A.T-G...AG...T.....    |
| 22q11.23 | .....                   |             | .....-.....AG...T.G..       |
| Yp11.2   | .....A...A.A.....       |             | T...A.G-G.A...AG...A.G..    |

Flockerzi et al. Additional Figure 2: Sequence comparison of PCR primers for amplification of HML-2 *gag* (A) and *env* (B) cDNAs with primer binding regions in HML-2 proviral loci. Proviral loci were included when at least one primer binding region was present. HML-2 loci identified as transcriptionally active are listed first, followed by loci not identified as active in this study. Locations of the latter are given as chromosomal bands. Reverse primer sequences have been reverse-complemented. "yes" indicates that the corresponding HML-2 locus has been found transcriptionally active by detection of its *gag* and/or *env* cDNA. Note that locus c19\_A consists only of *env*-LTR portions, and that loci c3\_D and c10\_B lack relevant *env*-LTR portions (see Additional Fig. 1).
